# Supplementary material
Source: Springer Nature journal article supplement (https://www.springermedizin.de/resource/supplementary/13569_2014_59_MOESM3_ESM.docx/9676738)
Supplement: MOESM3 [file 9676738]

Phase I trials included in the analysis

| **Author** | **Year** | **No of patients** | **Intervention** | **Outcome for CS patients** |
| --- | --- | --- | --- | --- |
| Serrone et al [26[ | 2001 | 44 advanced sarcoma (2 CS) | Group A: IFOS short infusion + EPI  Group B: IFOS continuous infusion + EPI | Not mentioned |
| Schwartz et al [27[ | 2005 | 38 advanced solid tumors with 6 sarcoma with at least 1 CS | LY293111 ( Leucotriene-B4 receptor antagonist) | 1 SD |
| Levine et al [28[ | 2006 | 51 advanced malignancies with 7 sarcoma with at least 1 CS | Veglin (VEGF antisense oligodeoxynucleotide) | 1 SD |
| Lockhart et al [29[ | 2007 | 18 advanced malignancies (1 CS) | MAC-321 (analogue of docetaxel) | 1 SD |
| Chawla et al [30[ | 2009 | 20 advanced sarcoma (1 CS) | Rexin-G (tumor-targeted retrovector)  Group A: 2 times a week  Group B: 3 times a week | Not mentioned |
| Camidge et al [31[ | 2010 | 50 advanced malignancies with 11 sarcoma with at least 1 CS | PRO95780 (death receptor 5 antibody) | 1 SD |
| Herbst et al [32[ | 2010 | 71 advanced malignancies with 9 sarcoma with at least 2 CS | rhApo2L/TRAIL (death receptor activator)  cohort 1: dose escalation  cohort 2: treated at MTD | 2 PR |
| Olmos et al [33[ | 2010 | 29 advanced sarcoma (1 CS) | Figitumumab (IGF1R antibody) | 1 SD |
| Qeuk et al [34[ | 2010 | 21 advanced solid tumors (1 CS) | Everolimus (mTOR inhibitor) and figitumumab (IGF1R antibody) | 1 SD |
| Stroppa et al [35[ | 2010 | 8 advanced sarcoma (1 CS) | Doxorubicin + IFOS | Not mentioned |
| Pacey et al [36[ | 2011 | 25 advanced solid tumors with at least 1 CS | Alvespimycin (heat shock protein 90 inhibitor) | 1 SD |
